# Supplementary material
Source: Springer Nature journal article supplement (https://www.springermedizin.de/resource/supplementary/12967_2013_1688_MOESM8_ESM.pdf/9574660)

**% ADCP**

100  
80  
60  
40  
20  
0

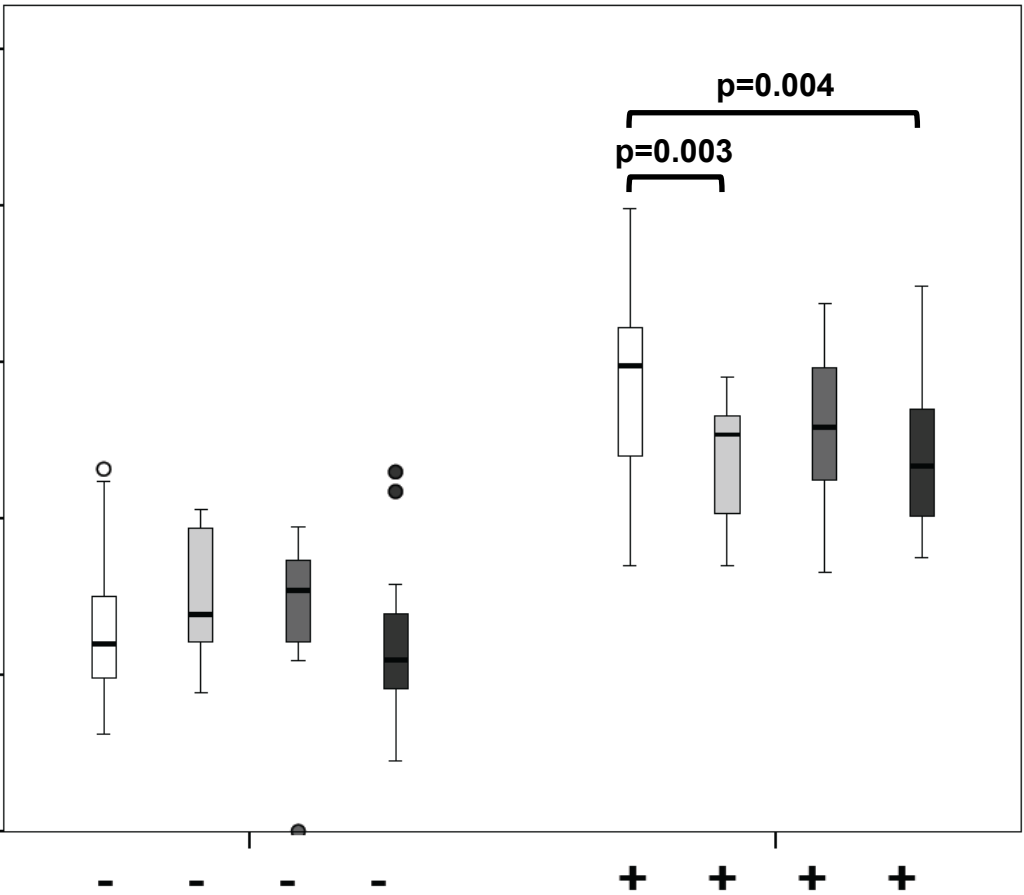

Supplement: MOESM8 [file 9574660]
